# Supplementary material for: Novel rod-Y2O3:Eu3+@0.01YVO4:Eu3+ with open core/shell nanostructure and “off-and-on” fluorescent performance
Source: Royal Society of Chemistry journal article supplement (doi:10.1039/c7ra08905h), 2017-01-01
Supplement: c7ra08905h1.pdf [file c7ra08905h1.pdf]

## Electronic Supplementary Information

### **Novel Rod- $\text{Y}_2\text{O}_3:\text{Eu}^{3+}$ @ $0.01\text{YVO}_4:\text{Eu}^{3+}$ with Open Core/Shell Nanostructure and “Off-and-On” Fluorescent Performance**

Nianchen Han,<sup>a</sup> Xueshan Gao,<sup>a</sup> Guang Lu,<sup>a</sup> Daiwen Zeng,<sup>a</sup> Xia Wan,<sup>a</sup> Shaolong Tie,<sup>\*a</sup> and Sheng Lan<sup>\*b</sup>

<sup>a</sup> College of Chemistry & Environment, South China Normal University; Guangzhou Key Laboratory of Materials for Energy Conversion and Storage, Guangzhou, Guangdong, 510006, China.

<sup>b</sup> College of Information & Optoelectronic Science and Engineering, South China Normal University; Guangdong Provincial Key Laboratory of Nanophotonic Functional Materials and Devices, Guangzhou, 510006, China.

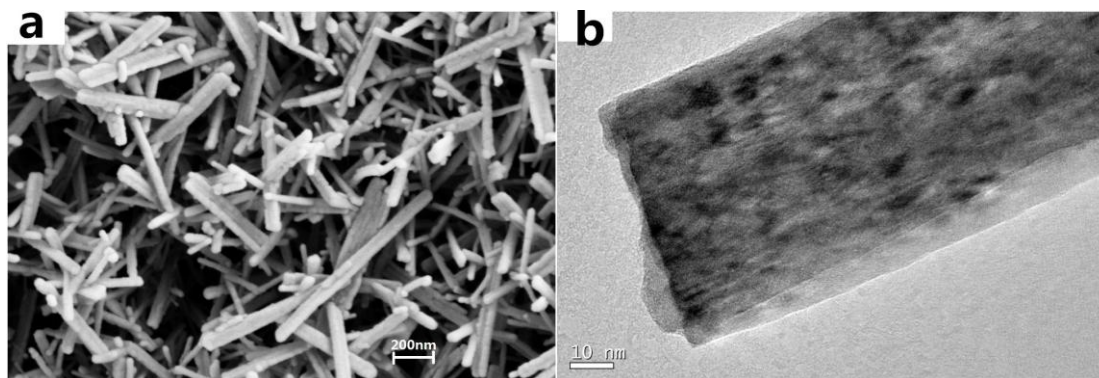

S1. SEM and HR-TEM images of  $\text{Y}_2\text{O}_3:\text{Eu}^{3+}@0.4\text{YVO}_4:\text{Eu}^{3+}$ .

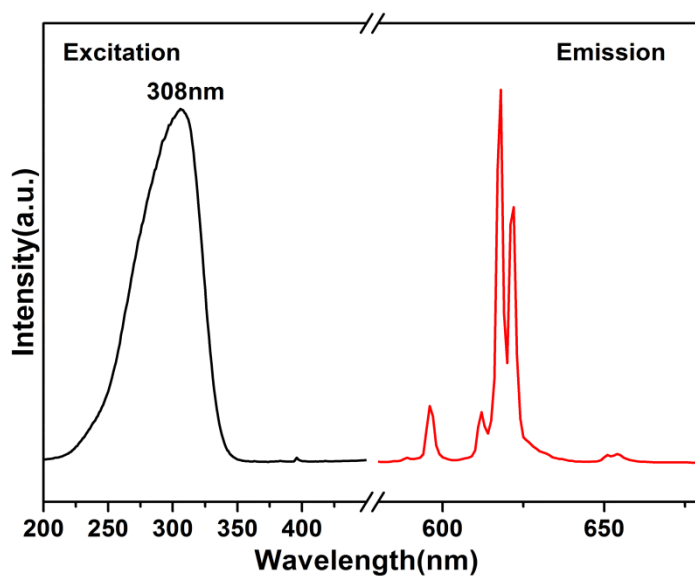

S2. Excitation (left) and emission (right) spectra of  $\text{Y}_2\text{O}_3:\text{Eu}^{3+}@0.4\text{YVO}_4:\text{Eu}^{3+}$ .

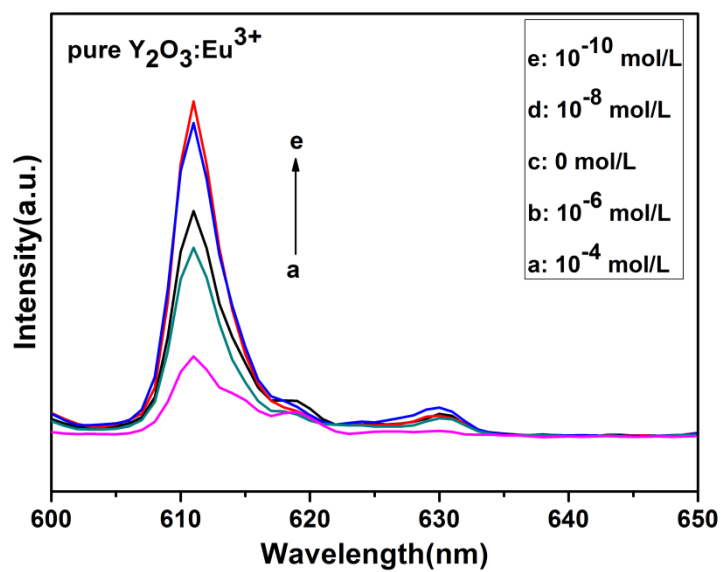

S3. Fluorescence response of pure  $\text{Y}_2\text{O}_3:\text{Eu}^{3+}$  in the presence of increasing concentration of  $\text{Cu}^{2+}$ .

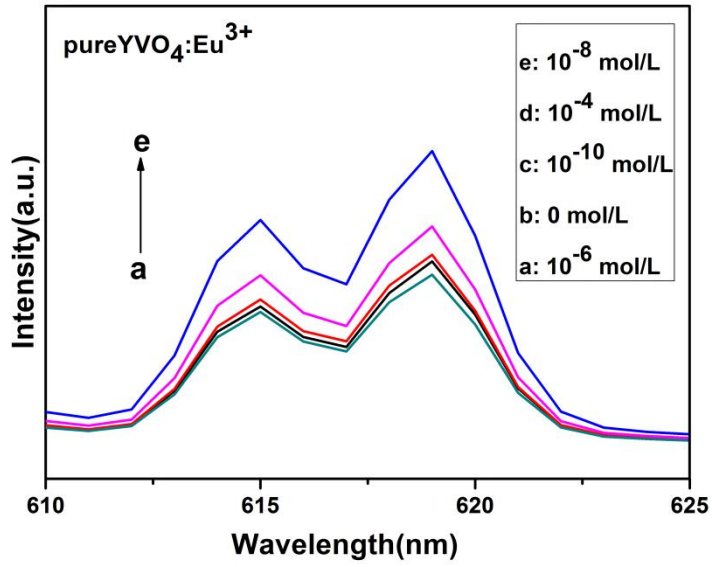

S4. Fluorescence response of pure  $\text{YVO}_4:\text{Eu}^{3+}$  in the presence of increasing concentration of  $\text{Cu}^{2+}$ .

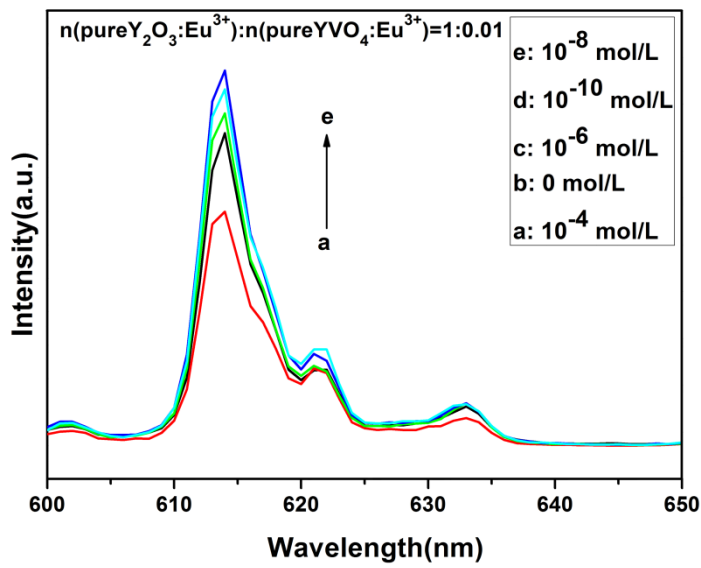

S5. Fluorescence response of  $\text{Y}_2\text{O}_3:\text{Eu}^{3+}$  and  $0.01\text{YVO}_4:\text{Eu}^{3+}$  in the presence of increasing concentration of  $\text{Cu}^{2+}$ .

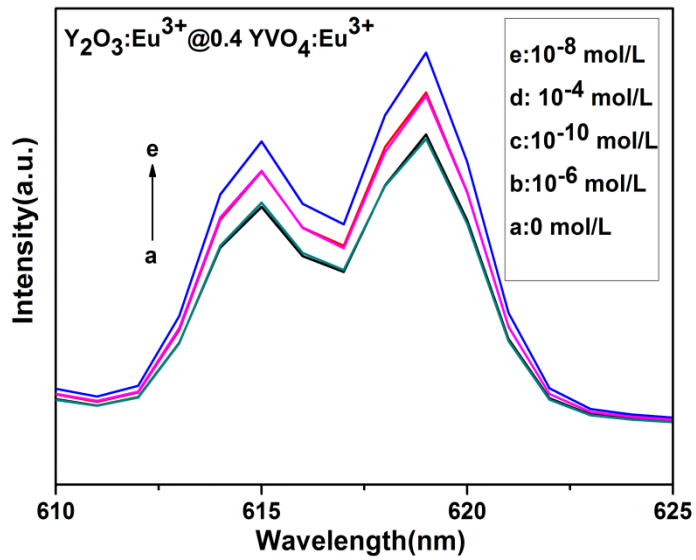

S6. Fluorescence response of Y<sub>2</sub>O<sub>3</sub>:Eu<sup>3+</sup>@ 0.4YVO<sub>4</sub>:Eu<sup>3+</sup> in the presence of increasing concentration of Cu<sup>2+</sup>.

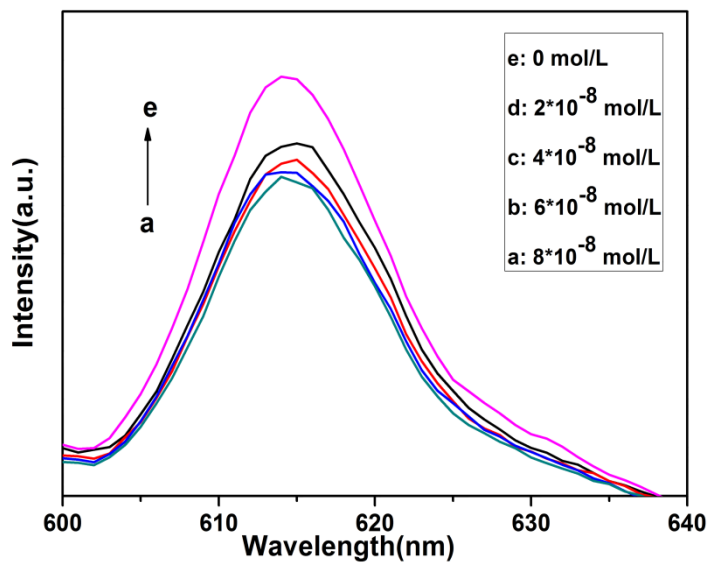

S7. Fluorescence response of rod-Y<sub>2</sub>O<sub>3</sub>:Eu<sup>3+</sup>@ 0.01YVO<sub>4</sub>:Eu<sup>3+</sup> in the presence of increasing concentration of Cu<sup>2+</sup> (2 , 4 , 6 and 8\* 10<sup>-8</sup> mol/L).

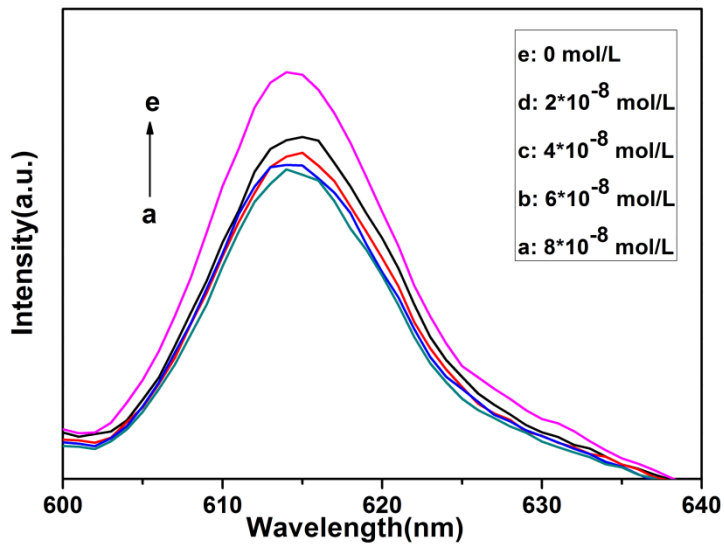

S8 Fluorescence response of rod- $\text{Y}_2\text{O}_3:\text{Eu}^{3+}$ @  $0.01\text{YVO}_4:\text{Eu}^{3+}$  in the presence of increasing concentration of  $\text{Cu}^{2+}$  (2 , 4 , 6 and  $8 \times 10^{-10}$  mol/L).

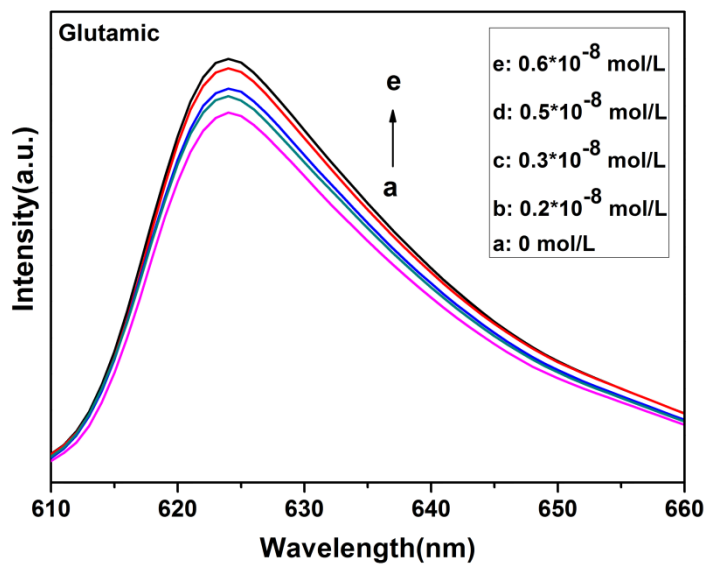

S9. Fluorescence response of rod- $\text{Y}_2\text{O}_3:\text{Eu}^{3+}$ @  $0.01\text{YVO}_4:\text{Eu}^{3+}-\text{Cu}^{2+}$  ( $10^{-8}$  mol/L) in the presence of increasing concentration of glutamic.

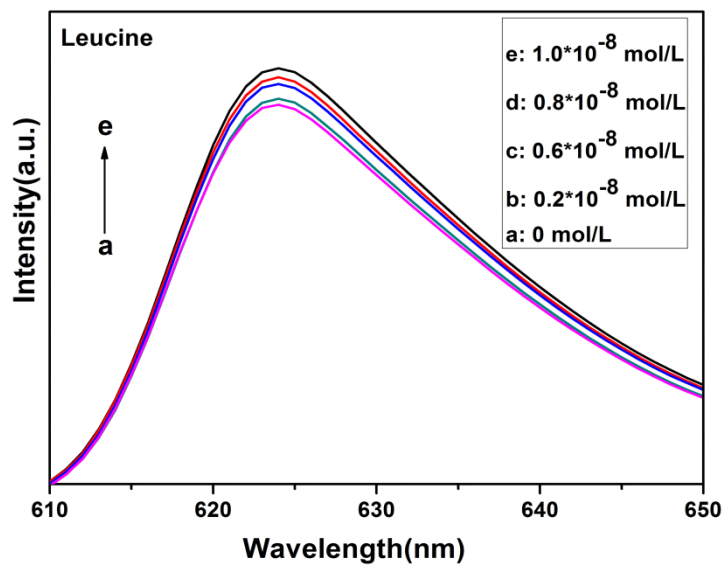

**S10.** Fluorescence response of rod-Y<sub>2</sub>O<sub>3</sub>:Eu<sup>3+</sup>@0.01YVO<sub>4</sub>:Eu<sup>3+</sup>-Cu<sup>2+</sup> (10<sup>-8</sup> mol/L) in the presence of increasing concentration of leucine.
